# Supplementary material for: Influence of conductive polymer doping on the viability of cardiac progenitor cells
Source: Royal Society of Chemistry journal article supplement (doi:10.1039/c4tb00142g), 2014-01-01
Supplement: c4tb00142g1.pdf [file c4tb00142g1.pdf]

**Table 1.** Summary of results. Errors are standard error.

| Dopant             | Roughness (nm) | Contact Angle (°) | EPC Cell Density ( $\mu\text{m}^2$ ) | CPC Cell Density ( $\mu\text{m}^2$ ) | EPC Live Ratio % | CPC Ratio Live % |
|--------------------|----------------|-------------------|--------------------------------------|--------------------------------------|------------------|------------------|
| Cl                 | 54 ± 13        | 19.7 ± 0.2        | 7.7E-04 ± 0.7E-03                    | 1.7E-03 ± 0.6E-03                    | 96.1 ± 0.8       | 96.7 ± 8.1       |
| CS                 | 11 ± 3         | 29 ± 6            | 1.7E-03 ± 0.8E-03                    | 1.4E-03 ± 0.7E-03                    | 98.0 ± 1.4       | 99.5 ± 0.3       |
| DBS                | 14 ± 6         | 60 ± 1            | 2.0E-03 ± 0.8E-03                    | 1.6E-03 ± 0.7E-03                    | 97.3 ± 2.7       | 96.9 ± 3.1       |
| DS                 | 23 ± 9         | 32 ± 7            | 1.7E-03 ± 0.6E-03                    | 1.7E-03 ± 0.7E-03                    | 97.6 ± 0.9       | 96.2 ± 0.2       |
| HA                 | 159 ± 26       | 38 ± 3            | 1.4E-03 ± 0.3E-03                    | 6.2E-04 ± 0.5E-03                    | 99.4 ± 0.9       | 49 ± 40          |
| LiClO <sub>4</sub> | 1087 ± 155     | 45 ± 4            | 9.5E-04 ± 0.6E-03                    | 4.2E-04 ± 0.2E-03                    | 94.2 ± 4.8       | 71 ± 16          |
| PSS                | 9 ± 1          | 23.0 ± 0.2        | 1.2E-03 ± 0.6E-03                    | 1.3E-03 ± 0.6E-03                    | 98.3 ± 1.6       | 97.2 ± 3.1       |
| pTS                | 24 ± 4         | 72 ± 1            | 1.6E-03 ± 0.6E-03                    | 1.6E-03 ± 0.7E-03                    | 98.7 ± 0.3       | 96.3 ± 2.1       |
| Control            | -              | -                 | 1.8E-03 ± 0.3E-03                    | 2.3E-03 ± 0.3E-03                    | 99.4 ± 0.3       | 98.8 ± 0.4       |
